# Supplementary material
Source: publisher figshare collection journal article supplement (https://springernature.figshare.com/ndownloader/files/17535527)
Supplement: Supplementary file [file 17535527]

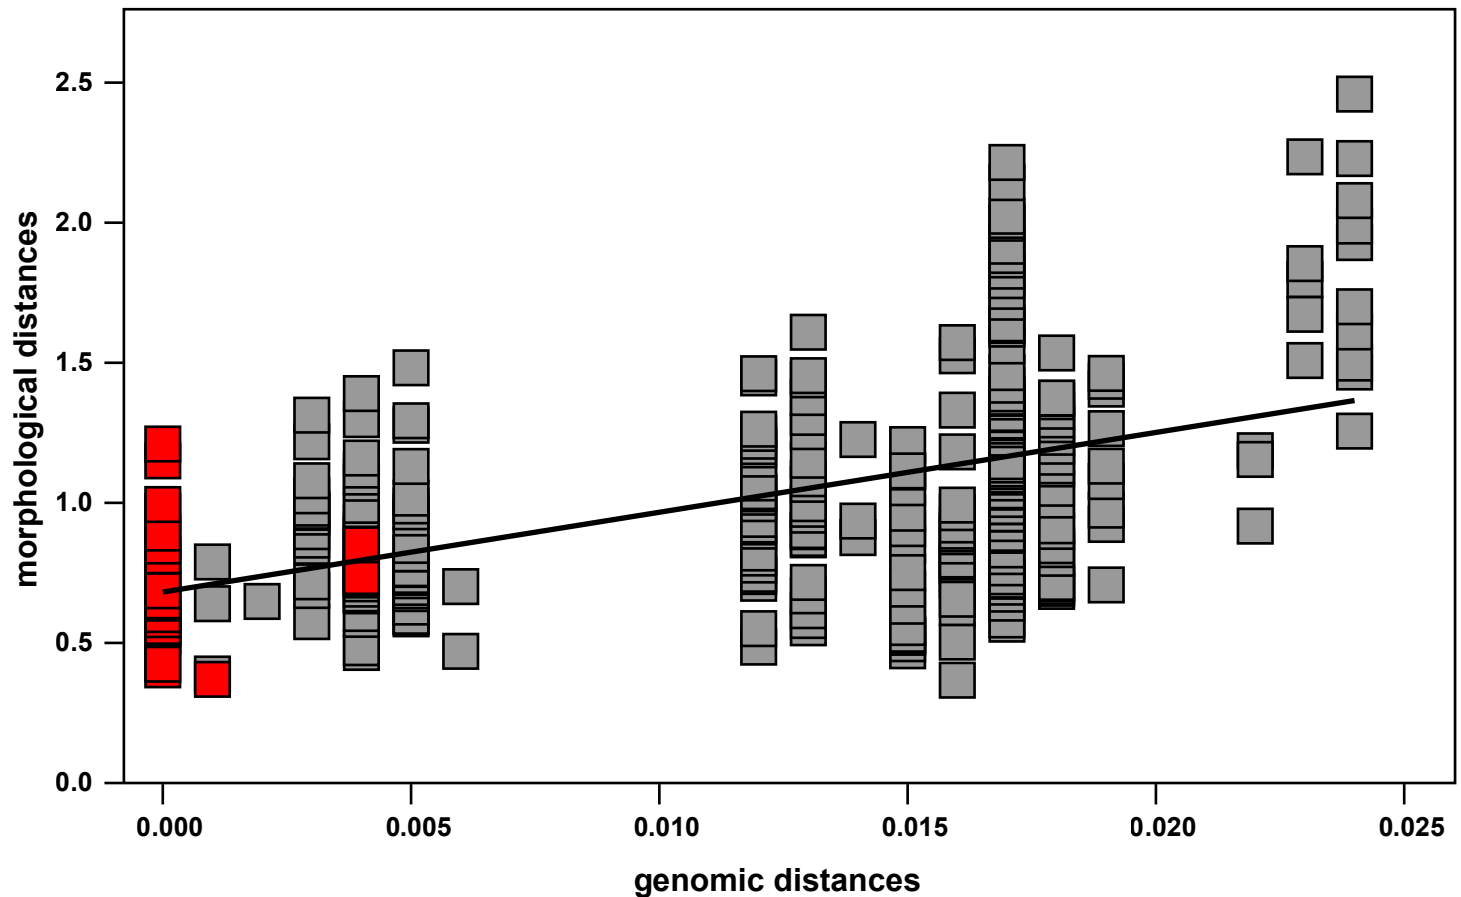

**Additional file 7: Morphological distances against genomic distances.** Morphological distances plotted against genomic distances (based on target hybrid enrichment data) between individuals of the *Pallenopsis patagonica* species complex. Red: intraspecific distances (the rightmost red squares represent intraclade distances of SUB\_2); grey: interspecific distances. Linear regression line is given ( $r=0.51$ ,  $p<0.0001$ ).
